# Supplementary material for: Efficient processing of complex XSD using Hive and Spark
Source: PeerJ Comput Sci. 2021 Aug 17;7:e652. doi: 10.7717/peerj-cs.652 (PMC8384044; doi:10.7717/peerj-cs.652)
Supplement: Supplemental Information 3 — There are two tabs. Hive tab presents the results of the query execution times, means, variances, and standard deviation for Hive internal and external tables from 14 queries identified in the proposed methodology. Spark tab presents the results of the query execution times, means, variances, and standard deviation for Spark data frames from 14 queries identified in the proposed methodology. [file peerj-cs-07-652-s003.xlsx]

## Sheet: Hive
					EXTERNAL TABLE				INTERNAL TABLE		INTERNAL TABLE
Vendor	Arrays	Structures	Attributes and Values	Xpaths	Question	Query time [ms]	Variance	Standard Deviation [ms]	Question	Query time [ms]	Variance	Standard Deviation [ms]
A	md[]	mff{}	mi{}gp#	/mdc/md.index/mi.index/gp	Q1	130	139.004	22.5326	Q1	85	32.6041	12.7486
	md[]mi{}mt[]	mfh{}	mi{}mts#	/mdc/ md.index/mi.index/mts	Q2	91	740.384		Q2	84	45.0241
	md[]mi{}mv[]	md[]mi{}	element{}moid#	/mdc/md.index/mi.index/mv.index/moid	Q3	153	1210.34		Q3	89	2.9241
	md[]mi{}mv[]r[]	mv[]element{}	r[]element#	/mdc/md.index/mi.index/mv.index/r.index/element	Q4	125	46.1041		Q4	93	5.2441
		md[]neid{}	neid{}nedn#	/mdc/md.index/neid/nedn	Q5	154	1280.92		Q5	108	298.944
			neid{}nesw#	/mdc/md.index/neid/nesw	Q6	93	635.544		Q6	84	45.0241
			neid{}neun#	/mdc/md.index/neid/neun	Q7	99	369.024		Q7	93	5.2441
			mff{}ts#	/mdc/mff/ts	Q8	107	125.664		Q8	74	279.224
			mfh{}cbt#	/mdc/mfh/cbt	Q9	97	449.864		Q9	72	350.064
			mfh{}ffv#	/mdc/mfh/ffv	Q10	150	1010.6		Q10	117	691.164
			mfh{}sn#	/mdc/mfh/sn	Q11	118	0.0441		Q11	99	68.7241
			mfh{}st#	/mdc/mfh/st	Q12	130	139.004		Q12	103	151.044
			mfh{}vn#	/mdc/mfh/vn	Q13	109	84.8241		Q13	90	0.5041
			mt[]element@	/mdc/md.index/mi.index/mt.index/element	Q14	99	369.024		Q14	79	137.124
					select *	185			select *	175
					Mean	118.214	507.72			90.7143	162.527
B	measData{}measInfo[]	fileFooter{}	fileHeader{}fileFormatVersion#	/measCollecFile/fileHeader/fileFormatVersion	Q1	110	79.7449	15.6867	Q1	94	130.645	11.4201
	measInfo[]measValue[]	fileFooter{}measCollec{}	fileHeader{}vendorName#	/measCollecFile/fileHeader/vendorName	Q2	128	725.225		Q2	77	31.0249
		fileHeader{}	measInfo[]measTypes#	/measCollecFile/measData.index/measInfo.index/measTypes	Q3	117	253.765		Q3	108	646.685
		fileHeader{}fileSender{}	measInfo[]__measInfoID#	/measCollecFile/measData.index/measInfo.index/measInfoId	Q4	85	258.245		Q4	73	91.5849
		fileHeader{}measCollec{}	measValue[]__measObjLdn#	/measCollecFile/measData.index/measInfo.index/measValue.index/measObjLdn	Q5	95	36.8449		Q5	79	12.7449
		measData{}	measValue[]measResults#	/measCollecFile/measData.index/measInfo.index/measValue.index/measResults	Q6	118	286.625		Q6	103	417.385
		measData{}managedElement{}	measValue[]suspect#	/measCollecFile/measData.index/measInfo.index/measValue.index/suspect	Q7	81	402.805		Q7	71	133.865
		measInfo[]grandPeriod{}	measCollec{}endTime@	/measCollecFile/fileFooter/measCollec/endTime	Q8	89	145.685		Q8	83	0.1849
		measInfo[]repPeriod{}	measCollec{}beginTime@	/measCollecFile/fileFooter/measCollec/beginTime	Q9	118	286.625		Q9	84	2.0449
			fileSender{}elementType@	/measCollecFile/fileHeader/fileSender/elementType	Q10	108	48.0249		Q10	80	6.6049
			measData{}userLabel@	/measCollecFile/measData.index/managedElement/userLabel	Q11	104	8.5849		Q11	81	2.4649
			grandPeriod{}duration@	/measCollecFile/measData.index/measInfo.index/granPeriod/duration	Q12	95	36.8449		Q12	76	43.1649
			grandPeriod{}endTime@	/measCollecFile/measData.index/measInfo.index/granPeriod/endTime	Q13	86	227.105		Q13	76	43.1649
			repPeriod{}duration@	/measCollecFile/measData.index/measInfo.index/repPeriod/duration	Q14	81	402.805		Q14	71	133.865
					select *	301			select *	268
						101.071	246.071			82.5714	130.418

## Sheet: Spark
	Question / Mobile Network Vendor	A [ms]	B [ms]
	Q1	1850	1880
	Q2	1840	1550
	Q3	1770	1980
	Q4	1360	1770
	Q5	1880	1800
	Q6	1030	1240
	Q7	1130	1100
	Q8	2050	1840
	Q9	1390	1920
	Q10	1850	1340
	Q11	1380	1480
	Q12	1300	1560
	Q13	1260	1290
	Q14	1600	1850
	select *	1980	1830
	Mean	1549.29	1614.29
	Variance	104453	82549.5
	Standard Deviation	323.192	287.314
