# Supplementary material for: Efficient processing of complex XSD using Hive and Spark
Source: PeerJ Comput Sci. 2021 Aug 17;7:e652. doi: 10.7717/peerj-cs.652 (PMC8384044; doi:10.7717/peerj-cs.652)
Supplement: Supplemental Information 4 — There are three tabs. Hive tab presents the results of the query execution times, means, variances, and standard deviation for Hive internal and external tables from 14 queries identified in the proposed methodology. Spark tab presents the results of the query execution times, means, variances, and standard deviation for Spark data frames from 14 queries identified in the proposed methodology. Different XML file sizes tab presents the results of the query execution times for different file sizes. [file peerj-cs-07-652-s004.xlsx]

## Sheet: Hive
					EXTERNAL TABLE				INTERNAL TABLE
Vendor	Arrays	Structures	Attributes and Values	Xpaths	Question	Query time [ms]	Variance	Standard Deviation [ms]	Question	Query time [ms]	Variance	Standard Deviation [ms]
A	md[]	mff{}	mi{}gp#	/mdc/md.index/mi.index/gp	Q1	94	42.25	8.37349	Q1	78	0.8649	2.67364
	md[]mi{}mt[]	mfh{}	mi{}mts#	/mdc/ md.index/mi.index/mts	Q2	105	20.25		Q2	81	15.4449
	md[]mi{}mv[]	md[]mi{}	element{}moid#	/mdc/md.index/mi.index/mv.index/moid	Q3	122	462.25		Q3	76	1.1449
	md[]mi{}mv[]r[]	mv[]element{}	r[]element#	/mdc/md.index/mi.index/mv.index/r.index/element	Q4	108	56.25		Q4	82	24.3049
		md[]neid{}	neid{}nedn#	/mdc/md.index/neid/nedn	Q5	104	12.25		Q5	78	0.8649
			neid{}nesw#	/mdc/md.index/neid/nesw	Q6	94	42.25		Q6	79	3.7249
			neid{}neun#	/mdc/md.index/neid/neun	Q7	101	0.25		Q7	79	3.7249
			mff{}ts#	/mdc/mff/ts	Q8	95	30.25		Q8	75	4.2849
			mfh{}cbt#	/mdc/mfh/cbt	Q9	89	132.25		Q9	77	0.0049
			mfh{}ffv#	/mdc/mfh/ffv	Q10	103	6.25		Q10	75	4.2849
			mfh{}sn#	/mdc/mfh/sn	Q11	105	20.25		Q11	73	16.5649
			mfh{}st#	/mdc/mfh/st	Q12	99	2.25		Q12	77	0.0049
			mfh{}vn#	/mdc/mfh/vn	Q13	94	42.25		Q13	73	16.5649
			mt[]element@	/mdc/md.index/mi.index/mt.index/element	Q14	94	42.25		Q14	76	1.1449
					select *	97			select *	80
					Mean [ms]	100.5	70.1154		Mean [ms]	77.0714	7.14835
B	measData{}measInfo[]	fileFooter{}	fileHeader{}fileFormatVersion#	/measCollecFile/fileHeader/fileFormatVersion	Q1	77	29.4849	6.46546	Q1	77	2.25	2.62386
	measInfo[]measValue[]	fileFooter{}measCollec{}	fileHeader{}vendorName#	/measCollecFile/fileHeader/vendorName	Q2	94	133.865		Q2	74	2.25
		fileHeader{}	measInfo[]measTypes#	/measCollecFile/measData.index/measInfo.index/measTypes	Q3	80	5.9049		Q3	74	2.25
		fileHeader{}fileSender{}	measInfo[]__measInfoID#	/measCollecFile/measData.index/measInfo.index/measInfoId	Q4	81	2.0449		Q4	75	0.25
		fileHeader{}measCollec{}	measValue[]__measObjLdn#	/measCollecFile/measData.index/measInfo.index/measValue.index/measObjLdn	Q5	85	6.6049		Q5	75	0.25
		measData{}	measValue[]measResults#	/measCollecFile/measData.index/measInfo.index/measValue.index/measResults	Q6	79	11.7649		Q6	80	20.25
		measData{}managedElement{}	measValue[]suspect#	/measCollecFile/measData.index/measInfo.index/measValue.index/suspect	Q7	85	6.6049		Q7	79	12.25
		measInfo[]grandPeriod{}	measCollec{}endTime@	/measCollecFile/fileFooter/measCollec/endTime	Q8	80	5.9049		Q8	75	0.25
		measInfo[]repPeriod{}	measCollec{}beginTime@	/measCollecFile/fileHeader/measCollec/beginTime	Q9	98	242.425		Q9	76	0.25
			fileSender{}elementType@	/measCollecFile/fileHeader/fileSender/elementType	Q10	84	2.4649		Q10	72	12.25
			measData{}userLabel@	/measCollecFile/measData.index/managedElement/userLabel	Q11	77	29.4849		Q11	76	0.25
			grandPeriod{}duration@	/measCollecFile/measData.index/measInfo.index/granPeriod/duration	Q12	80	5.9049		Q12	76	0.25
			grandPeriod{}endTime@	/measCollecFile/measData.index/measInfo.index/granPeriod/endTime	Q13	78	19.6249		Q13	78	6.25
			repPeriod{}duration@	/measCollecFile/measData.index/measInfo.index/repPeriod/duration	Q14	76	41.3449		Q14	70	30.25
					select *	75			select *	84
					Mean [ms]	82.4286	41.8022		Mean [ms]	75.5	6.88462

## Sheet: Spark
	Question / Mobile Network Vendor	A [ms]	Variance	B [ms]	Variance
	Q1	193	849.14	243	812.25
	Q2	217	2823.86	168	2162.25
	Q3	307	20489.1	423	43472.2
	Q4	219	3040.42	253	1482.25
	Q5	143	435.14	239	600.25
	Q6	158	34.3396	186	812.25
	Q7	118	2103.14	249	1190.25
	Q8	193	849.14	187	756.25
	Q9	166	4.5796	133	6642.25
	Q10	86	6062.18	139	5700.25
	Q11	106	3347.78	206	72.25
	Q12	103	3703.94	216	2.25
	Q13	108	3120.34	157	3306.25
	Q14	177	172.66	204	110.25
	select *	937		396
	Mean [ms]	163.857		214.5
	Variance	3618.13		5163.19
	Standard Deviation [ms]	60.1509		71.8554

## Sheet: Different  XML file sizes
	EXTERNAL TABLES	INTERNAL TABLES
Number of XML rows	time [ms]	time [ms]
2823	97	82
28230	92	76
282300	90	81
2823000	1855	438
